# Supplementary material for: Four years of atmospheric mercury records in NorthwesternPatagonia (Argentina): potential sources, concentration patterns and influence of environmental variables observed at the GMOS EMMAstation
Source: Copernicus journal article supplement (doi:10.5194/acp-2016-1076), 2017-01-02
Supplement: Supplementary file 1 [file acp-2016-1076-supplement.pdf]

## Supplementary material

**Table S1.** Descriptive statistics of meteorological variables [temperature (t), wind speed (ws), wind direction (wd) and relative humidity (rh)] and GEM concentration recorded at the EMMA Station (Nahuel Huapi National Park, Northwestern Patagonia) are reported referring to both the whole data frame (October 23, 2012 - May 15, 2016), as well as to each of the four seasons (Summer, Autumn, Winter and Spring) .

| Variable                  |                   | Whole data frame<br>(2012-2016) | Summer<br>(DJF) | Autumn<br>(MAM) | Winter<br>(JJA) | Spring<br>(SON) |
|---------------------------|-------------------|---------------------------------|-----------------|-----------------|-----------------|-----------------|
| t (°C)                    | n                 | 25700                           | 7853            | 8537            | 4068            | 5242            |
|                           | Min               | -9.6                            | -2.4            | -4.6            | -9.6            | -5.8            |
|                           | 1 <sup>st</sup> Q | 4.1                             | 8.3             | 4.7             | -0.3            | 2.9             |
|                           | Median            | 8.5                             | 13.4            | 8.6             | 2.2             | 6.7             |
|                           | Mean              | 9.6                             | 14.49           | 9.012           | 2.25            | 7.851           |
|                           | 3rd Q             | 14.2                            | 19.8            | 12.6            | 4.8             | 12.2            |
|                           | Max               | 37.7                            | 37.7            | 33.1            | 16.2            | 30              |
| ws (m s <sup>-1</sup> )   | Min               | 0                               | 0               | 0               | 0               | 0               |
|                           | 1 <sup>st</sup> Q | 0                               | 0               | 0               | 0               | 0               |
|                           | Median            | 1.6                             | 3.2             | 1.6             | 1.6             | 3.2             |
|                           | Mean              | 3.568                           | 4.342           | 3.018           | 2.502           | 4.13            |
|                           | 3rd Q             | 6.4                             | 6.4             | 4.8             | 4.8             | 8               |
|                           | Max               | 22.5                            | 19.3            | 16.1            | 22.5            | 19.3            |
| wd (°)                    | Direction         | 315°(NW)                        | 292.5°(WNW)     | 315°(NW)        | 315°(NW)        | 315°(NW)        |
|                           | Frequency         | 15387                           | 5080            | 3546            | 3279            | 4254            |
|                           | Direction         | 292.5° (WNW)                    | 315°(NW)        | 292°(WNW)       | 292°(WNW)       | 292°(WNW)       |
|                           | Frequency         | 13503                           | 4308            | 3361            | 2353            | 2710            |
| rh (%)                    | Min               | 12                              | 14              | 12              | 27              | 19              |
|                           | 1 <sup>st</sup> Q | 52                              | 46              | 58              | 61              | 47              |
|                           | Median            | 64                              | 59              | 72              | 69              | 58              |
|                           | Mean              | 64.73                           | 58.9            | 71.4            | 71.45           | 57.4            |
|                           | 3rd Q             | 78                              | 71              | 89              | 84              | 67              |
|                           | Max               | 100                             | 98              | 100             | 100             | 99              |
| GEM (ng m <sup>-3</sup> ) | Min               | 0.23                            | 0.31            | 0.23            | 0.39            | 0.42            |
|                           | 1 <sup>st</sup> Q | 0.77                            | 0.76            | 0.71            | 0.85            | 0.84            |
|                           | Median            | 0.87                            | 0.86            | 0.80            | 0.93            | 0.93            |
|                           | Mean (SD)         | 0.87 (0.15)                     | 0.86 (0.15)     | 0.81 (0.15)     | 0.92 (0.10)     | 0.93 (0.13)     |
|                           | 3rd Q             | 0.97                            | 0.96            | 0.92            | 1.00            | 1.01            |
|                           | Max               | 1.42                            | 1.42            | 1.16            | 1.17            | 1.31            |

**Table S2.** Results of the Principal Component Analysis (PCA) performed to study the relationship between meteorological variables and GEM concentrations trends recorded at the EMMA Station (Nahuel Huapi National Park, Northwestern Patagonia). The values reported in the table are the contributions of the variables (based on correlations) to the main factors/components (Factors 1, 2, 3, Variance explained >15%).

| <b>Variable</b>                    | <b>Factor 1</b> | <b>Factor 2</b> | <b>Factor 3</b> |
|------------------------------------|-----------------|-----------------|-----------------|
| temperature                        | 0.805           | -0.381          | -0.13           |
| Wind speed                         | 0.813           | 0.206           | -0.135          |
| Relative humidity                  | -0.814          | 0.33            | 0.029           |
| Wind direction                     | 0.267           | 0.821           | -0.434          |
| GEM                                | 0.453           | 0.415           | 0.783           |
| Variance explained (%)             | 44.97           | 22.85           | 16.73           |
| Cummulative Variance explained (%) | 44.97           | 67.82           | 84.56           |

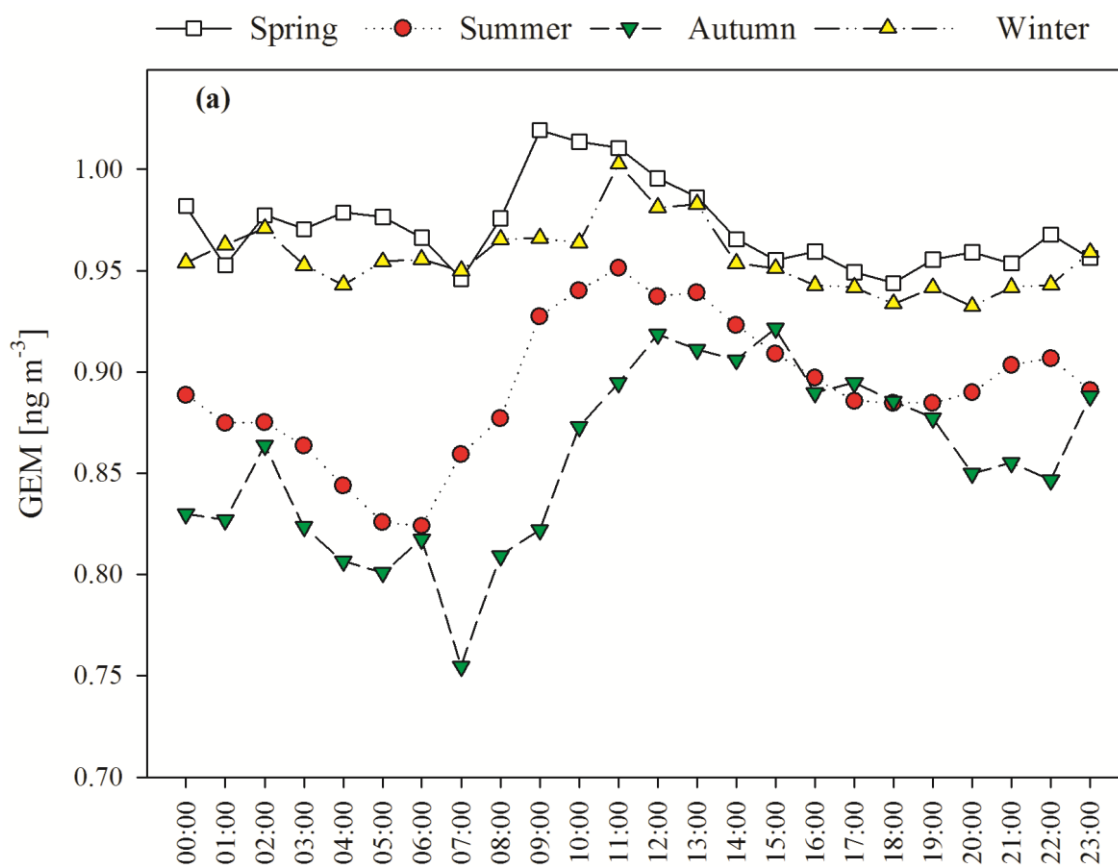

**Figure S1. a)** Mean hourly GEM concentrations ( $\text{ng m}^{-3}$ ) at the EMMA Station (Nahuel Huapi National Park, Northwestern Patagonia) calculated seasonally for the whole data frame (October 23, 2012 - May 15, 2016).

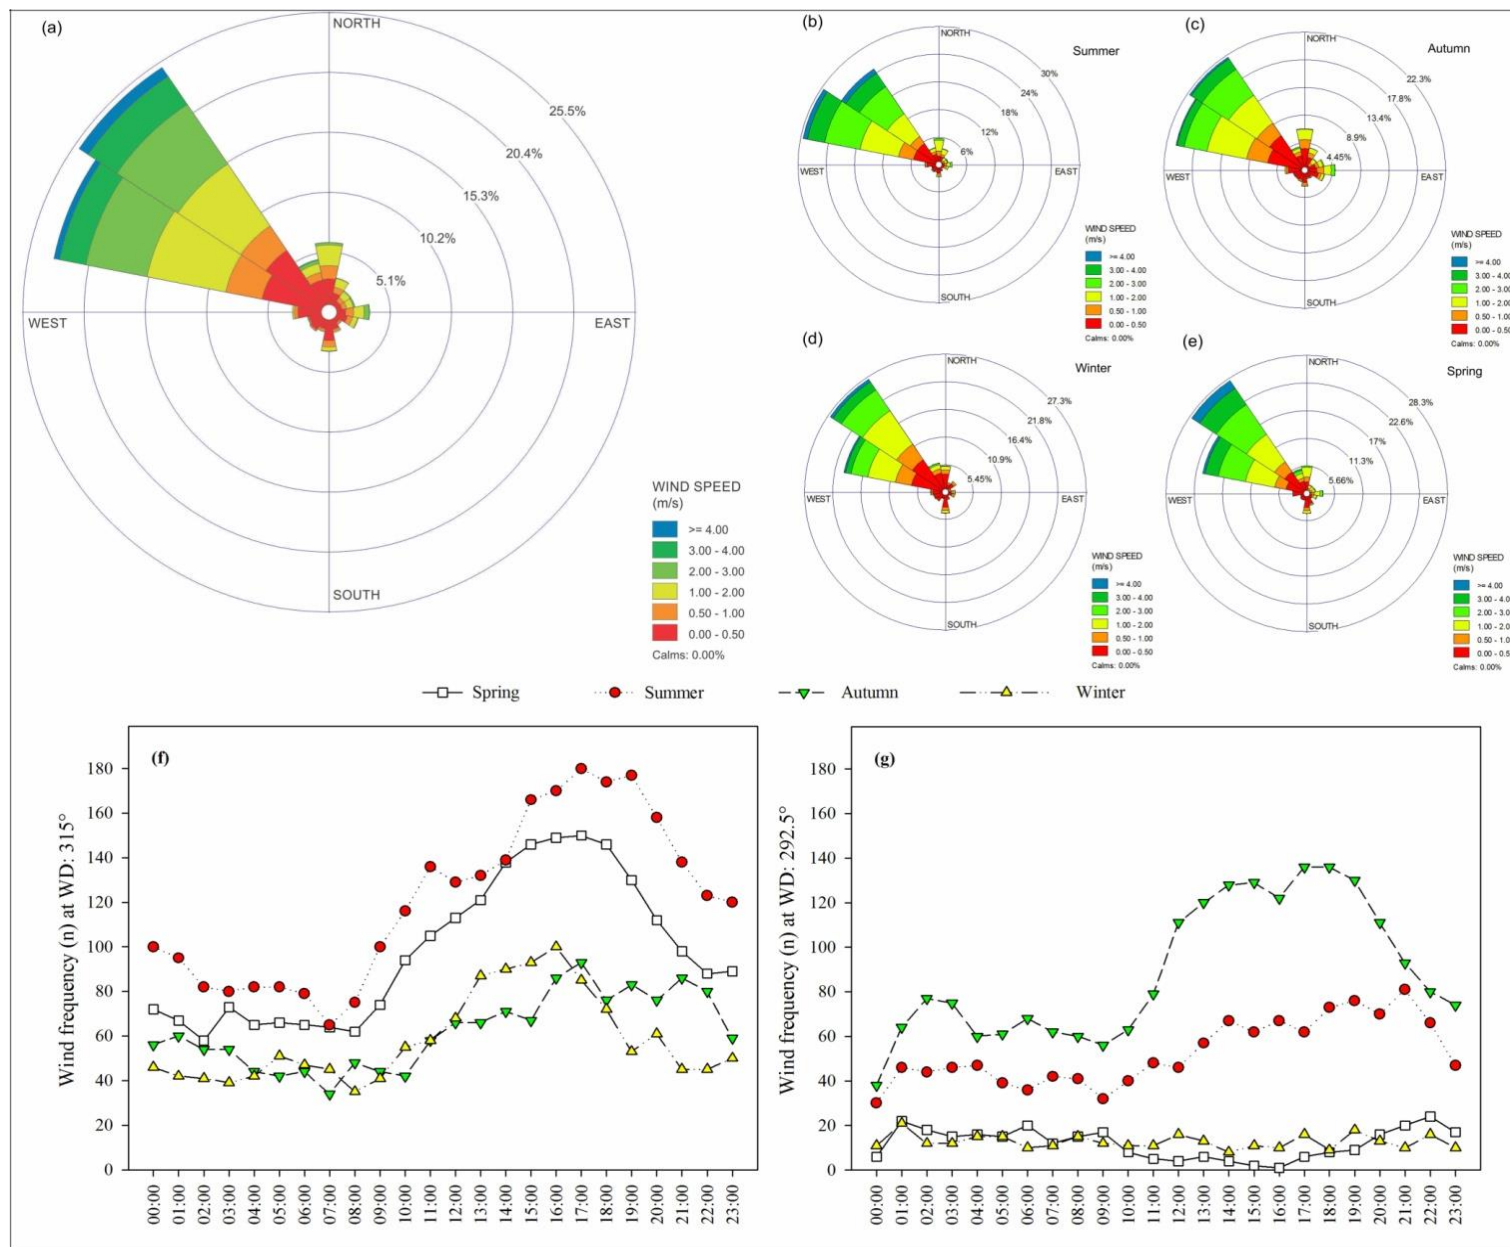

**Figure S2.** Prevailing wind direction at the EMMA Station (Nahuel Huapi National Park, Northwestern Patagonia) calculated as frequency for: a) the whole data frame (October 23, 2012 - May 15, 2016), b) summer, c) autumn, d) winter and, e) spring; f) daily frequency of the prevailing winds on a seasonal basis (315°), and g) daily frequency of the second prevailing winds in a seasonal basis (292.5°).

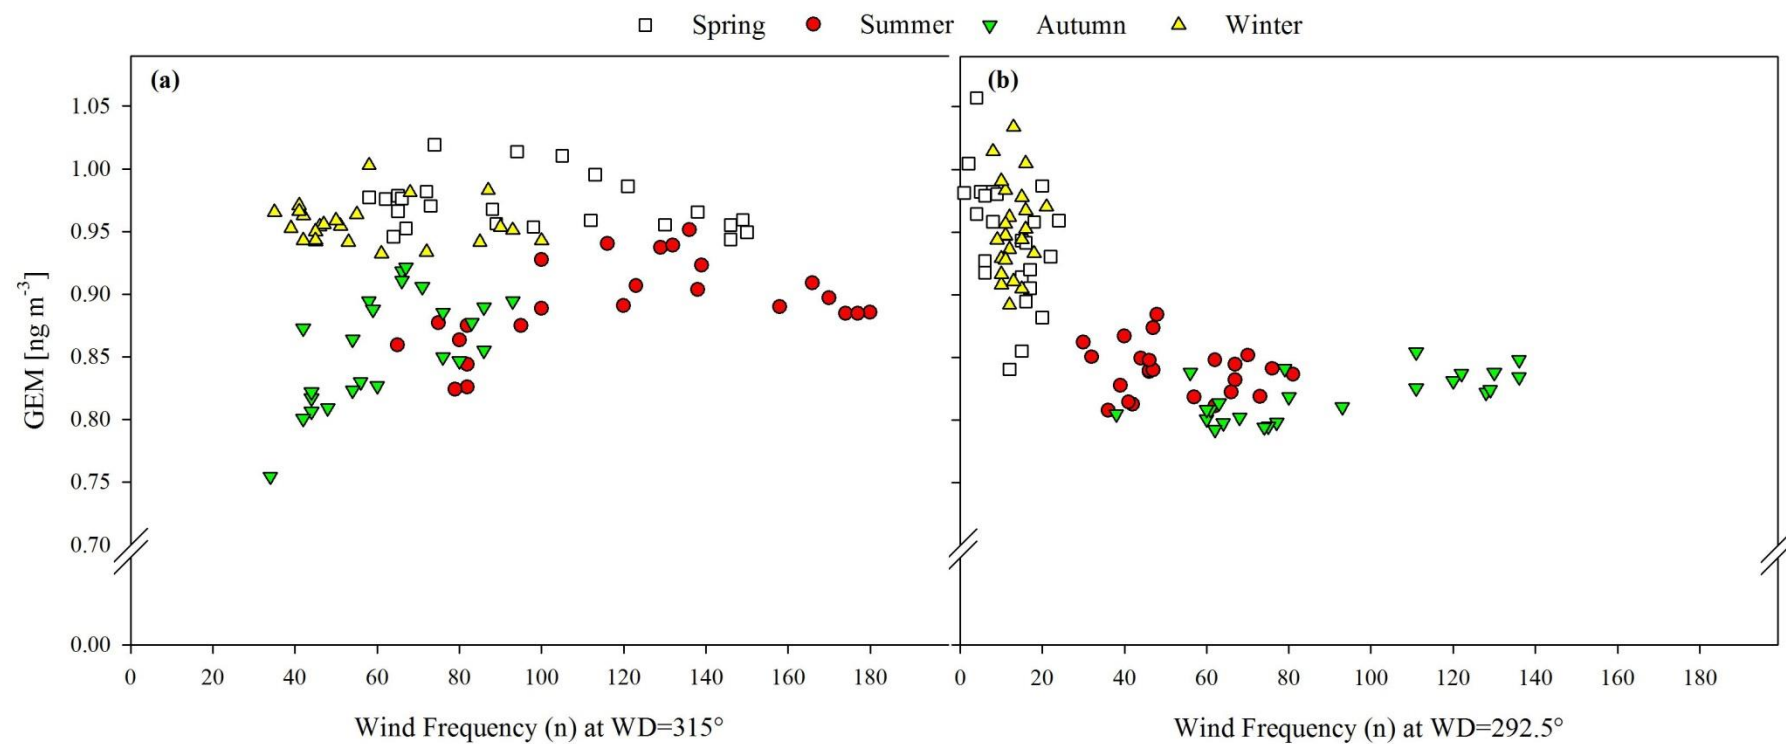

**Figure S3.** a) GEM concentration (ng m<sup>-3</sup>) vs. frequency of the prevailing winds (WD=315°) and b) GEM concentration (ng m<sup>-3</sup>) vs. frequency of the second prevailing winds (WD=292.5°), during the studied period (October 23, 2012 - May 15, 2016) at the EMMA station (Nahuel Huapi National Park, Northwestern Patagonia).
